# Supplementary material
Source: PubMed Central journal article supplement (PMC8095216)
Supplement: 296_2021_4863_MOESM1_ESM.pdf [file 296_2021_4863_MOESM1_ESM.pdf]

Supplementary Table 1. Comparison between patients with complete and missing data.

|                                                                                                                                                                                             | Complete data<br>N=341<br>(79.1%) | Missing data<br>N=90<br>(20.9%) | P value |
|---------------------------------------------------------------------------------------------------------------------------------------------------------------------------------------------|-----------------------------------|---------------------------------|---------|
| Age, years, mean (sd)                                                                                                                                                                       | 57.6 (0.7)                        | 58.5 (1.5)                      | 0.59    |
| Male, n (%)                                                                                                                                                                                 | 127 (37.2)                        | 24 (26.7)                       | 0.06    |
| GCs $\geq$ 7.5 mg per day, n (%)                                                                                                                                                            | 17 (5.0)                          | 9 (10.0)                        | 0.08    |
| csDMARDs, n (%)                                                                                                                                                                             | 112 (32.8)                        | 26 (28.9)                       | 0.47    |
| bDMARDs – TNFi, n (%)                                                                                                                                                                       | 232 (68.0)                        | 68 (75.6)                       | 0.17    |
| At least 1 visit, n (%)                                                                                                                                                                     | 119 (34.9)                        | 46 (51.1)                       | <0.01   |
| Disease, n (%)                                                                                                                                                                              |                                   |                                 |         |
| Rheumatoid arthritis                                                                                                                                                                        | 199 (58.4)                        | 46 (51.1)                       | 0.08    |
| Psoriatic arthritis                                                                                                                                                                         | 83 (24.3)                         | 19 (21.1)                       |         |
| Ankylosing spondylitis                                                                                                                                                                      | 59 (17.3)                         | 25 (27.8)                       |         |
| GCs, glucocorticoids; csDMARDs, conventional synthetic disease-modifying anti-rheumatic drug; bDMARDs, biologic disease-modifying anti-rheumatic drug, TNFi tumor necrosis factor inhibitor |                                   |                                 |         |
